# Supplementary material for: In-vitro engineered human cerebral tissues mimic pathological circuit disturbances in 3D
Source: PubMed Central journal article supplement (PMC8943047; doi:10.1038/s42003-022-03203-4), 2022-03-23
Supplement: 42003_2022_3203_MOESM3_ESM.pdf [file 42003_2022_3203_MOESM3_ESM.pdf]

## Description of Additional Supplementary Files

**File name:** Supplementary Movie 1

**Description:** Time-lapse recording of live fluorescent calcium imaging of a MARC-produced cerebral tissue (week 4).

**File name:** Supplementary Movie 2

**Description:** Time-lapse recording of live fluorescent calcium imaging of neurite connections between two cerebral tissues across the porous membrane of the iS3CC (week 6).

**File name:** Supplementary Movie 3

**Description:** Time-lapse recording of live fluorescent calcium imaging of two interconnected cerebral tissues in the iS3CC before and after Penicillin treatment in the left chamber (week 6).

**File name:** Supplementary Software 1

**Description:** Matlab codes used to perform network analysis and synchrony of the neuron activities in the MARC tissues

**File name:** Supplementary Data 1

**Description:** Diffusion across chambers in iS3CC chip.xlsx. The measured concentration as a function of time in the receiving chamber.

**File name:** Supplementary Data 2

**Description:** Intensity and activity change upon Penicillin treatment.xlsx. Quantification of the change in fluorescence intensity and fold change in neuronal activity induced by addition of Penicillin G in the treated and untreated cerebral tissues. Each row represents each monitored cell.

**File name:** Supplementary Data 3

**Description:** Signal propagation traces.mat. Matlab data file containing structured data of the traces of signal propagation in both chambers in the Penicillin treatment experiment.

**File name:** Supplementary Data 4

**Description:** Neuronal network activity.mat. Matlab data file containing activity of neurons in the MARC tissue as reported through fluorescence intensity.
